# Supplementary material for: Surface passivation of carbon dots with ethylene glycol and their high-sensitivity to Fe3+
Source: Royal Society of Chemistry journal article supplement (doi:10.1039/c6ra25465a), 2017-01-01
Supplement: c6ra25465a1.pdf [file c6ra25465a1.pdf]

## Supplementary Information

### Surface passivation of carbon dots with ethylene glycol and its application for high-sensitivity of Fe<sup>3+</sup>

Zhaogan Wang<sup>a,+</sup>, Peng Long<sup>a,+</sup>, Chengqun Qin<sup>a</sup>, Yiyu Feng<sup>a,c,d</sup>, Wei Feng<sup>a,b,c,d,\*</sup>,

<sup>a</sup> School of Materials Science and Engineering, Tianjin University, Tianjin 300072,  
P. R China.

<sup>b</sup> Collaborative Innovation Center of Chemical Science and Engineering (Tianjin),  
Tianjin 300072, P. R China.

<sup>c</sup> Key Laboratory of Advanced Ceramics and Machining Technology, Ministry of  
Education, Tianjin 300072, P. R China.

<sup>d</sup> Tianjin Key Laboratory of Composite and Functional Materials, Tianjin 300072,  
P. R China.

<sup>+</sup> These authors contributed equally to this work.

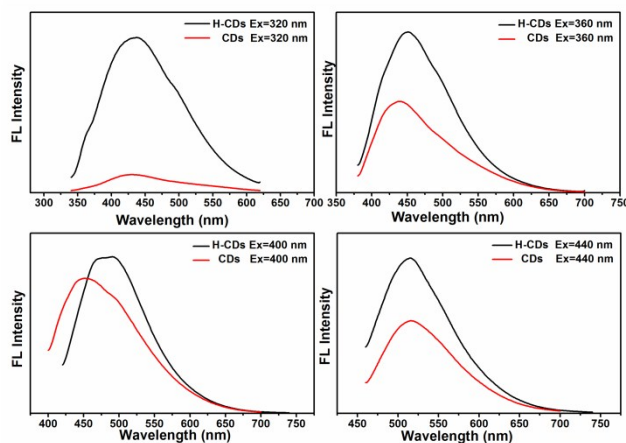

Fig. S1 the fluorescence intensity of CDs and H-CDs when excited at different wavelength

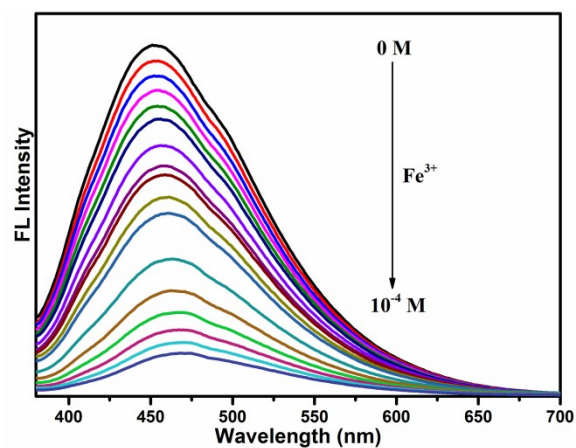

Fig. S2 the PL spectra of the CDs solutions in the presence of  $\text{Fe}^{3+}$  at different concentrations

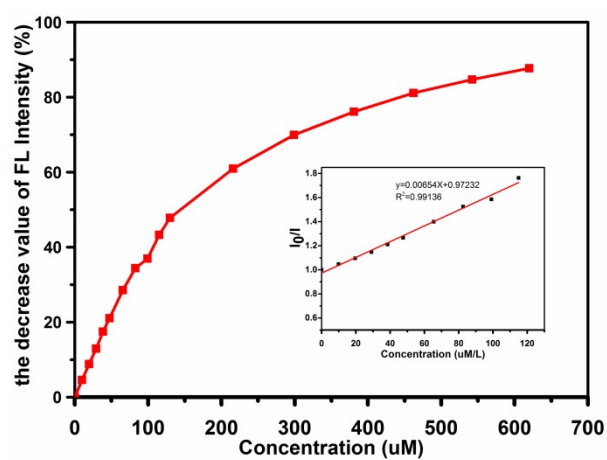

Fig. S3 the Stern-Volmer relationship of CDs between the PL intensity and the concentration, the inset displays a linear Stern-Volmer plot at low concentration rang of  $\text{Fe}^{3+}$ .

Table S1 the detection limits of 11 repeated experiments and their the standard deviation

|                                    |          |          |          |          |          |          |
|------------------------------------|----------|----------|----------|----------|----------|----------|
| Serial number                      | 1        | 2        | 3        | 4        | 5        |          |
| LOD (nM)                           | 2.557375 | 2.509374 | 2.603017 | 2.729994 | 2.5932   |          |
| Serial number                      | 6        | 7        | 8        | 9        | 10       | 11       |
| LOD (nM)                           | 2.505455 | 2.7269   | 2.624307 | 2.565554 | 2.530483 | 2.634362 |
| The standard deviation of LOD (nM) | 0.0773   |          |          |          |          |          |

Table S2 the concrete data of error bars in figure 4d

| Metal ions                                                | Ag <sup>+</sup>  | Zn <sup>2+</sup> | Al <sup>3+</sup> | Ba <sup>2+</sup> |                  | Fe <sup>2+</sup> |
|-----------------------------------------------------------|------------------|------------------|------------------|------------------|------------------|------------------|
| The standard deviation<br>of the decrease in FL intensity | 0.009            | 0.01             | 0.0086           | 0.008            |                  | 0.009            |
| Metal ions                                                | Cu <sup>2+</sup> | Ni <sup>2+</sup> | Cr <sup>3+</sup> | Pb <sup>2+</sup> | Co <sup>2+</sup> | Fe <sup>3+</sup> |
| The standard deviation<br>of the decrease in FL intensity | 0.006            | 0.002            | 0.003            | 0.002            | 0.002            | 0.003            |
